# Supplementary material for: Wet-Spinning Assembly of Continuous, Highly Stable Hyaluronic/Multiwalled Carbon Nanotube Hybrid Microfibers
Source: MDPI journal article supplement (doi:10.3390/polym11050867), 2019-05-13
Supplement: s1 [file s1]

## Supplementary Materials

### Wet-Spinning Assembly of Continuous, Highly Stable Hyaluronic/Multiwalled Carbon Nanotube Hybrid Microfibers

Ting Zheng, Nuo Xu, Qi Kan, Hongbin Li, Chunrui Lu, Peng Zhang, Xiaodan Li, Dongxing Zhang and Xiaodong Wang

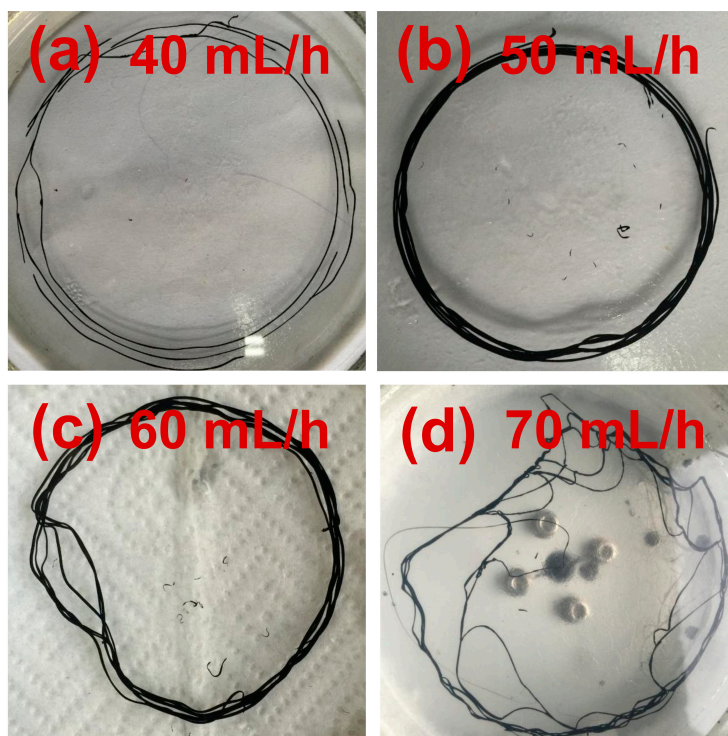

**Figure S1.** The graphs of HA/MWCNTs microfibers prepared with different injection speed.

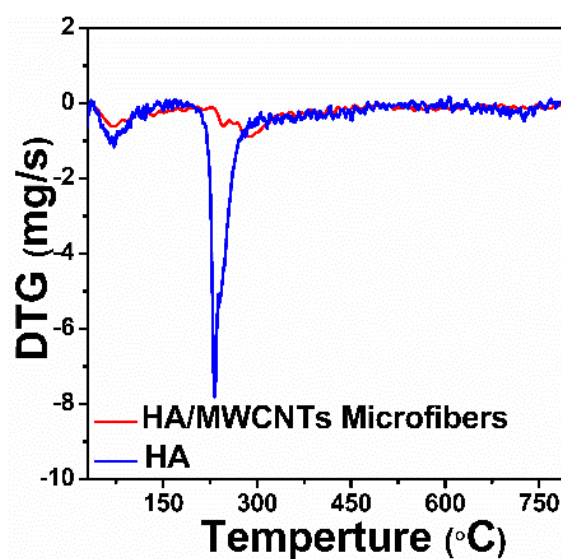

**Figure S2.** DTG curves of HA and HA/MWCNTs microfibers.
